# Supplementary material
Source: PubMed Central journal article supplement (PMC8329841)

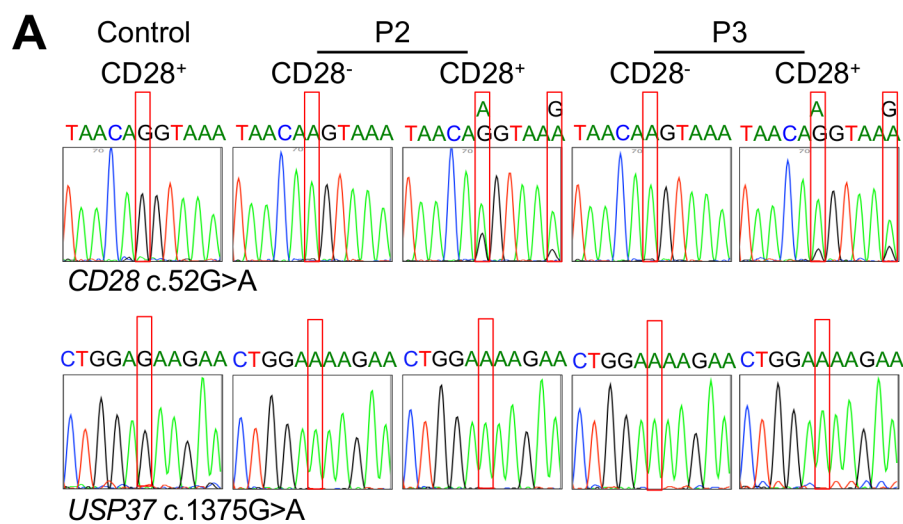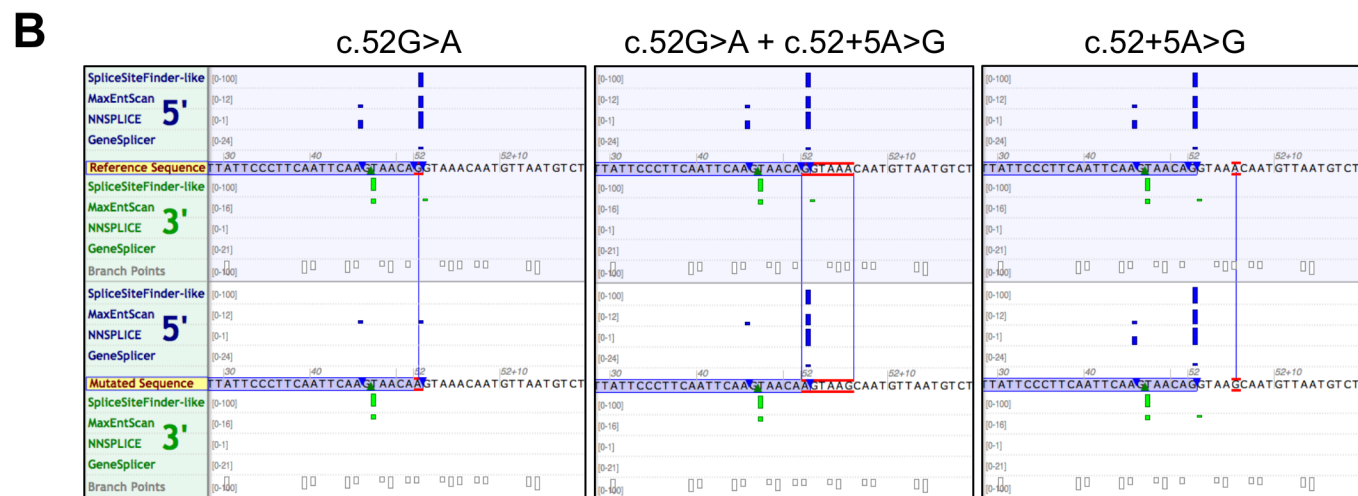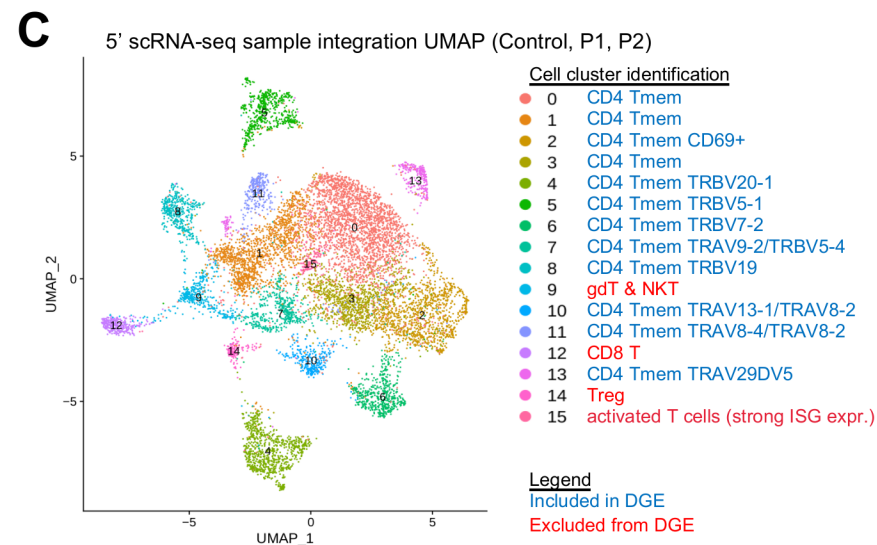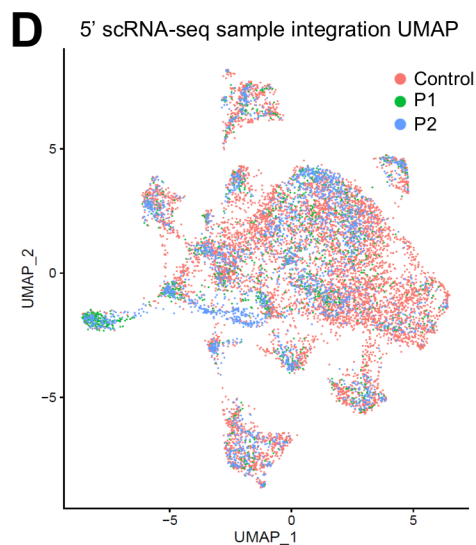

Supplement: NIHMS1717953-supplement-10.pdf [file NIHMS1717953-supplement-10.pdf]

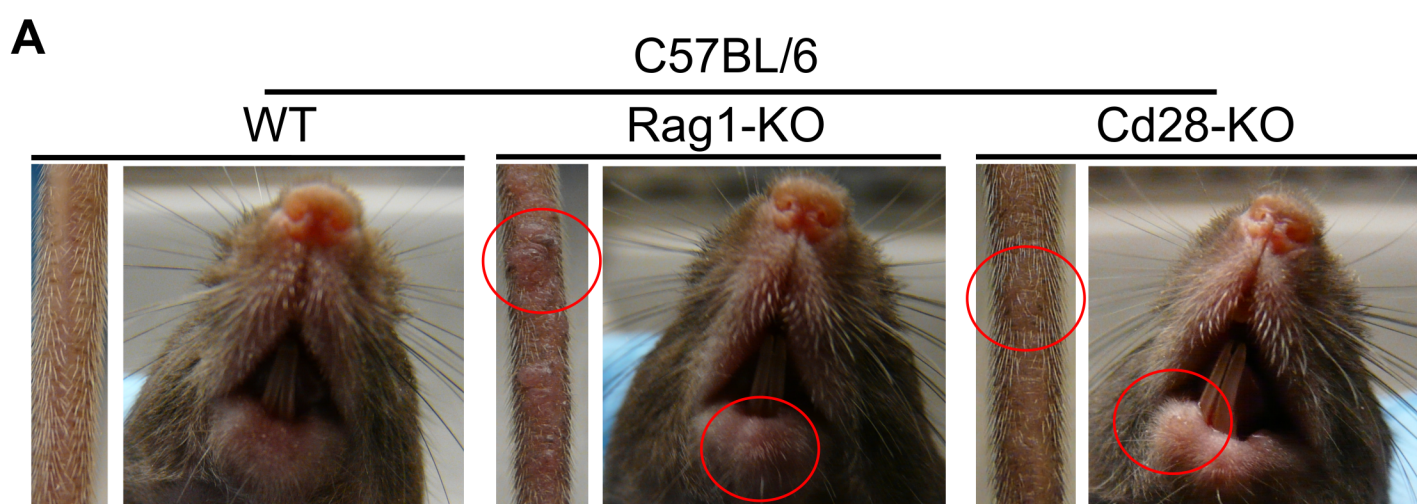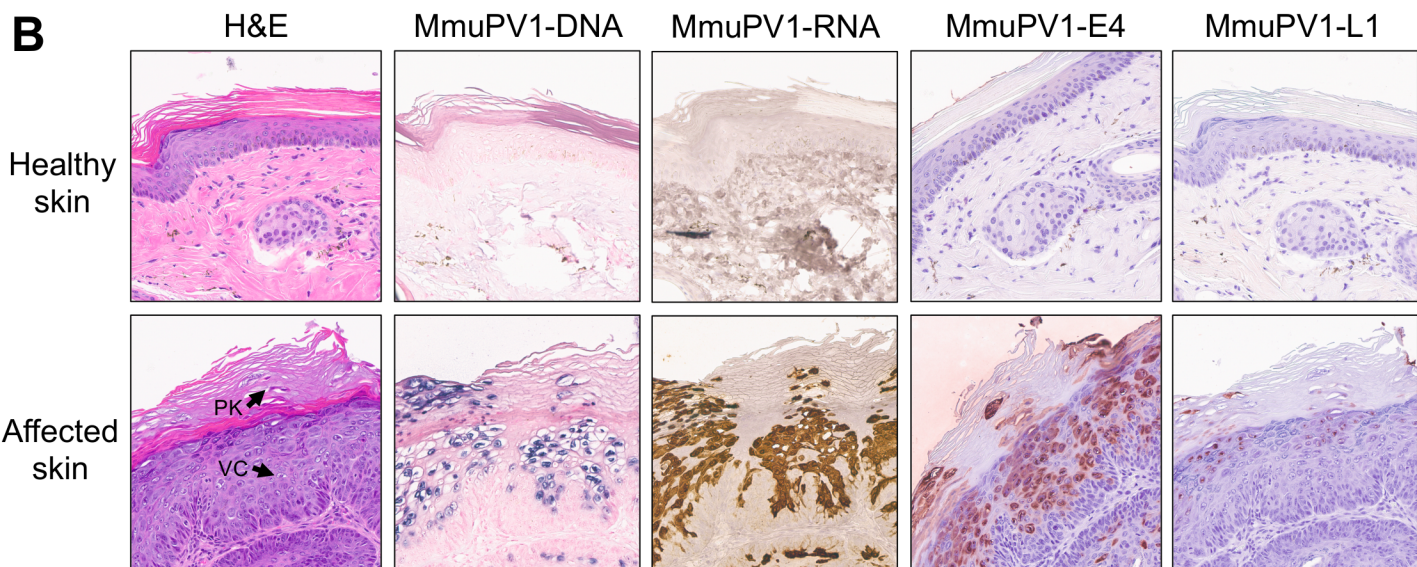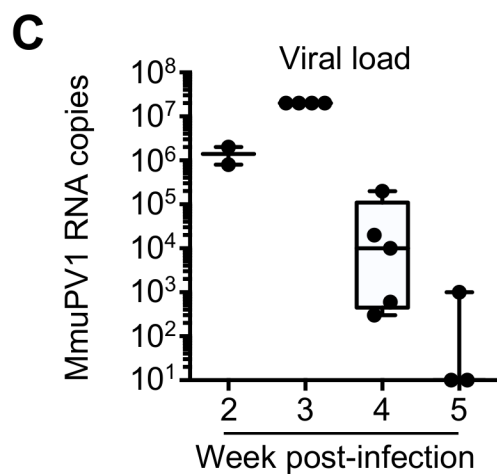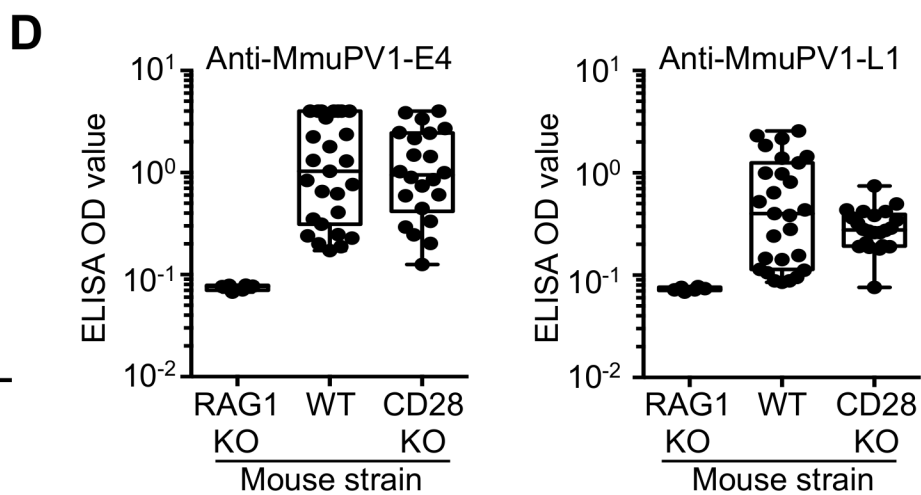

Supplement: NIHMS1717953-supplement-5.pdf [file NIHMS1717953-supplement-5.pdf]

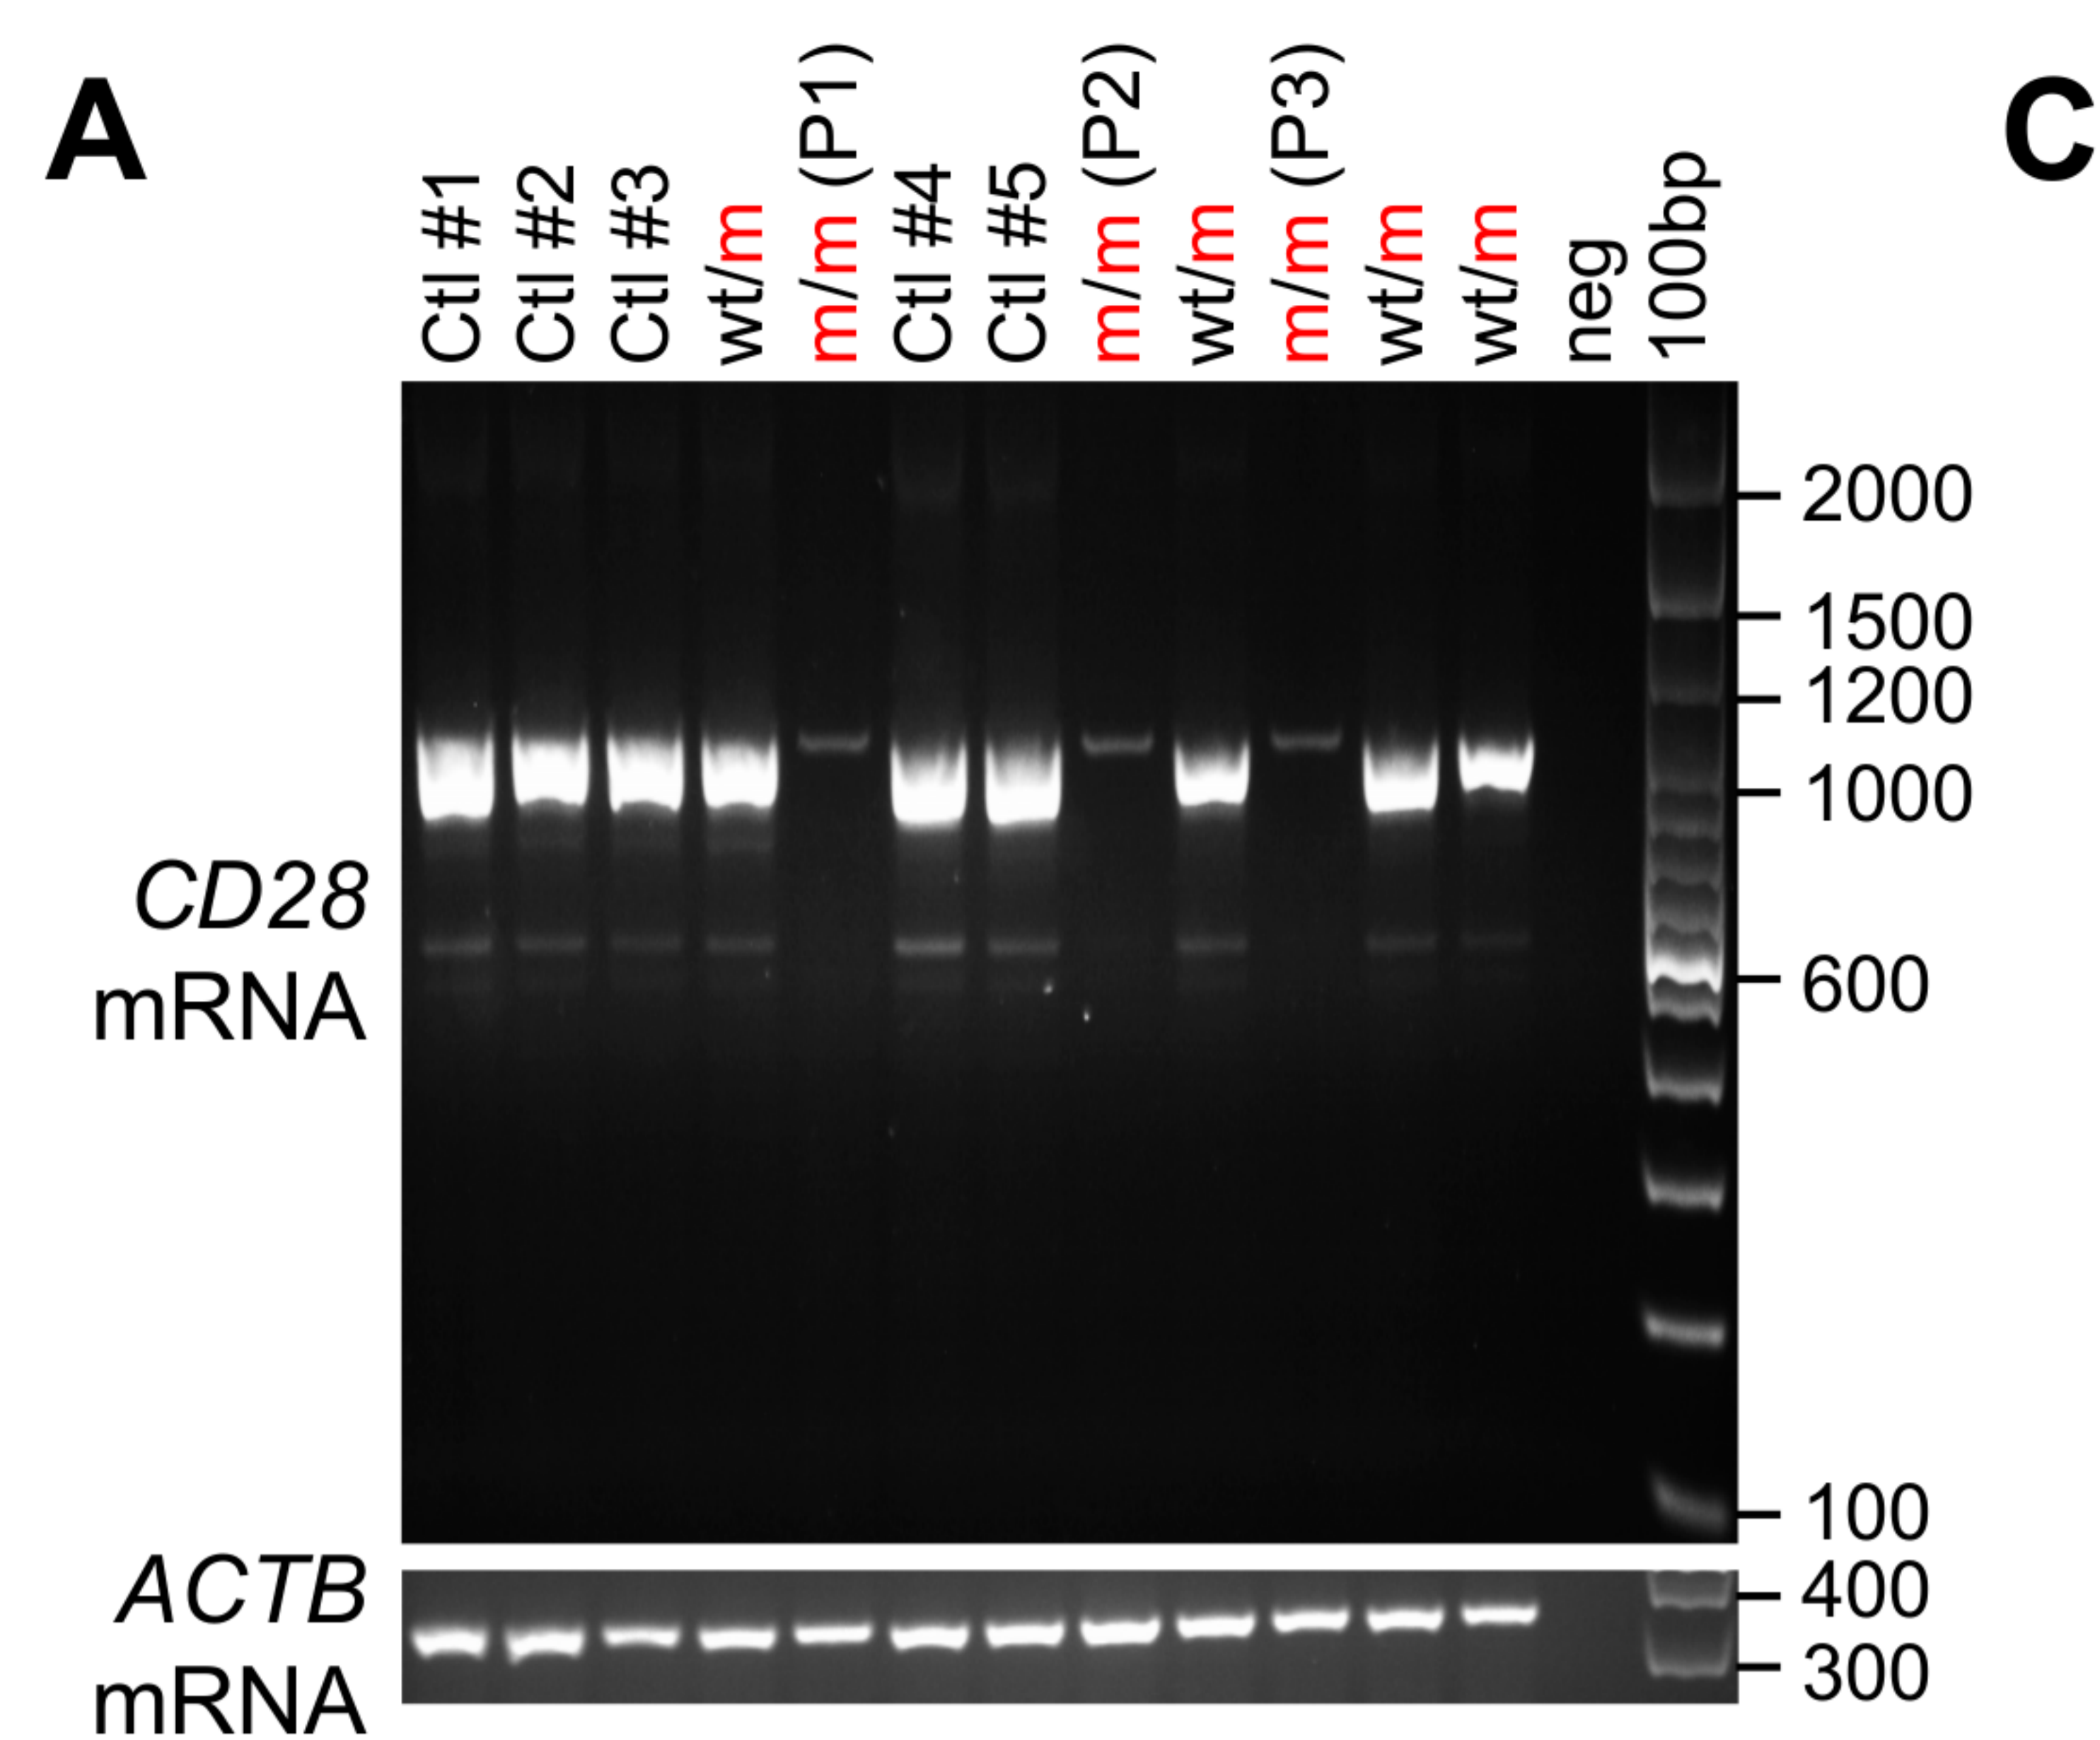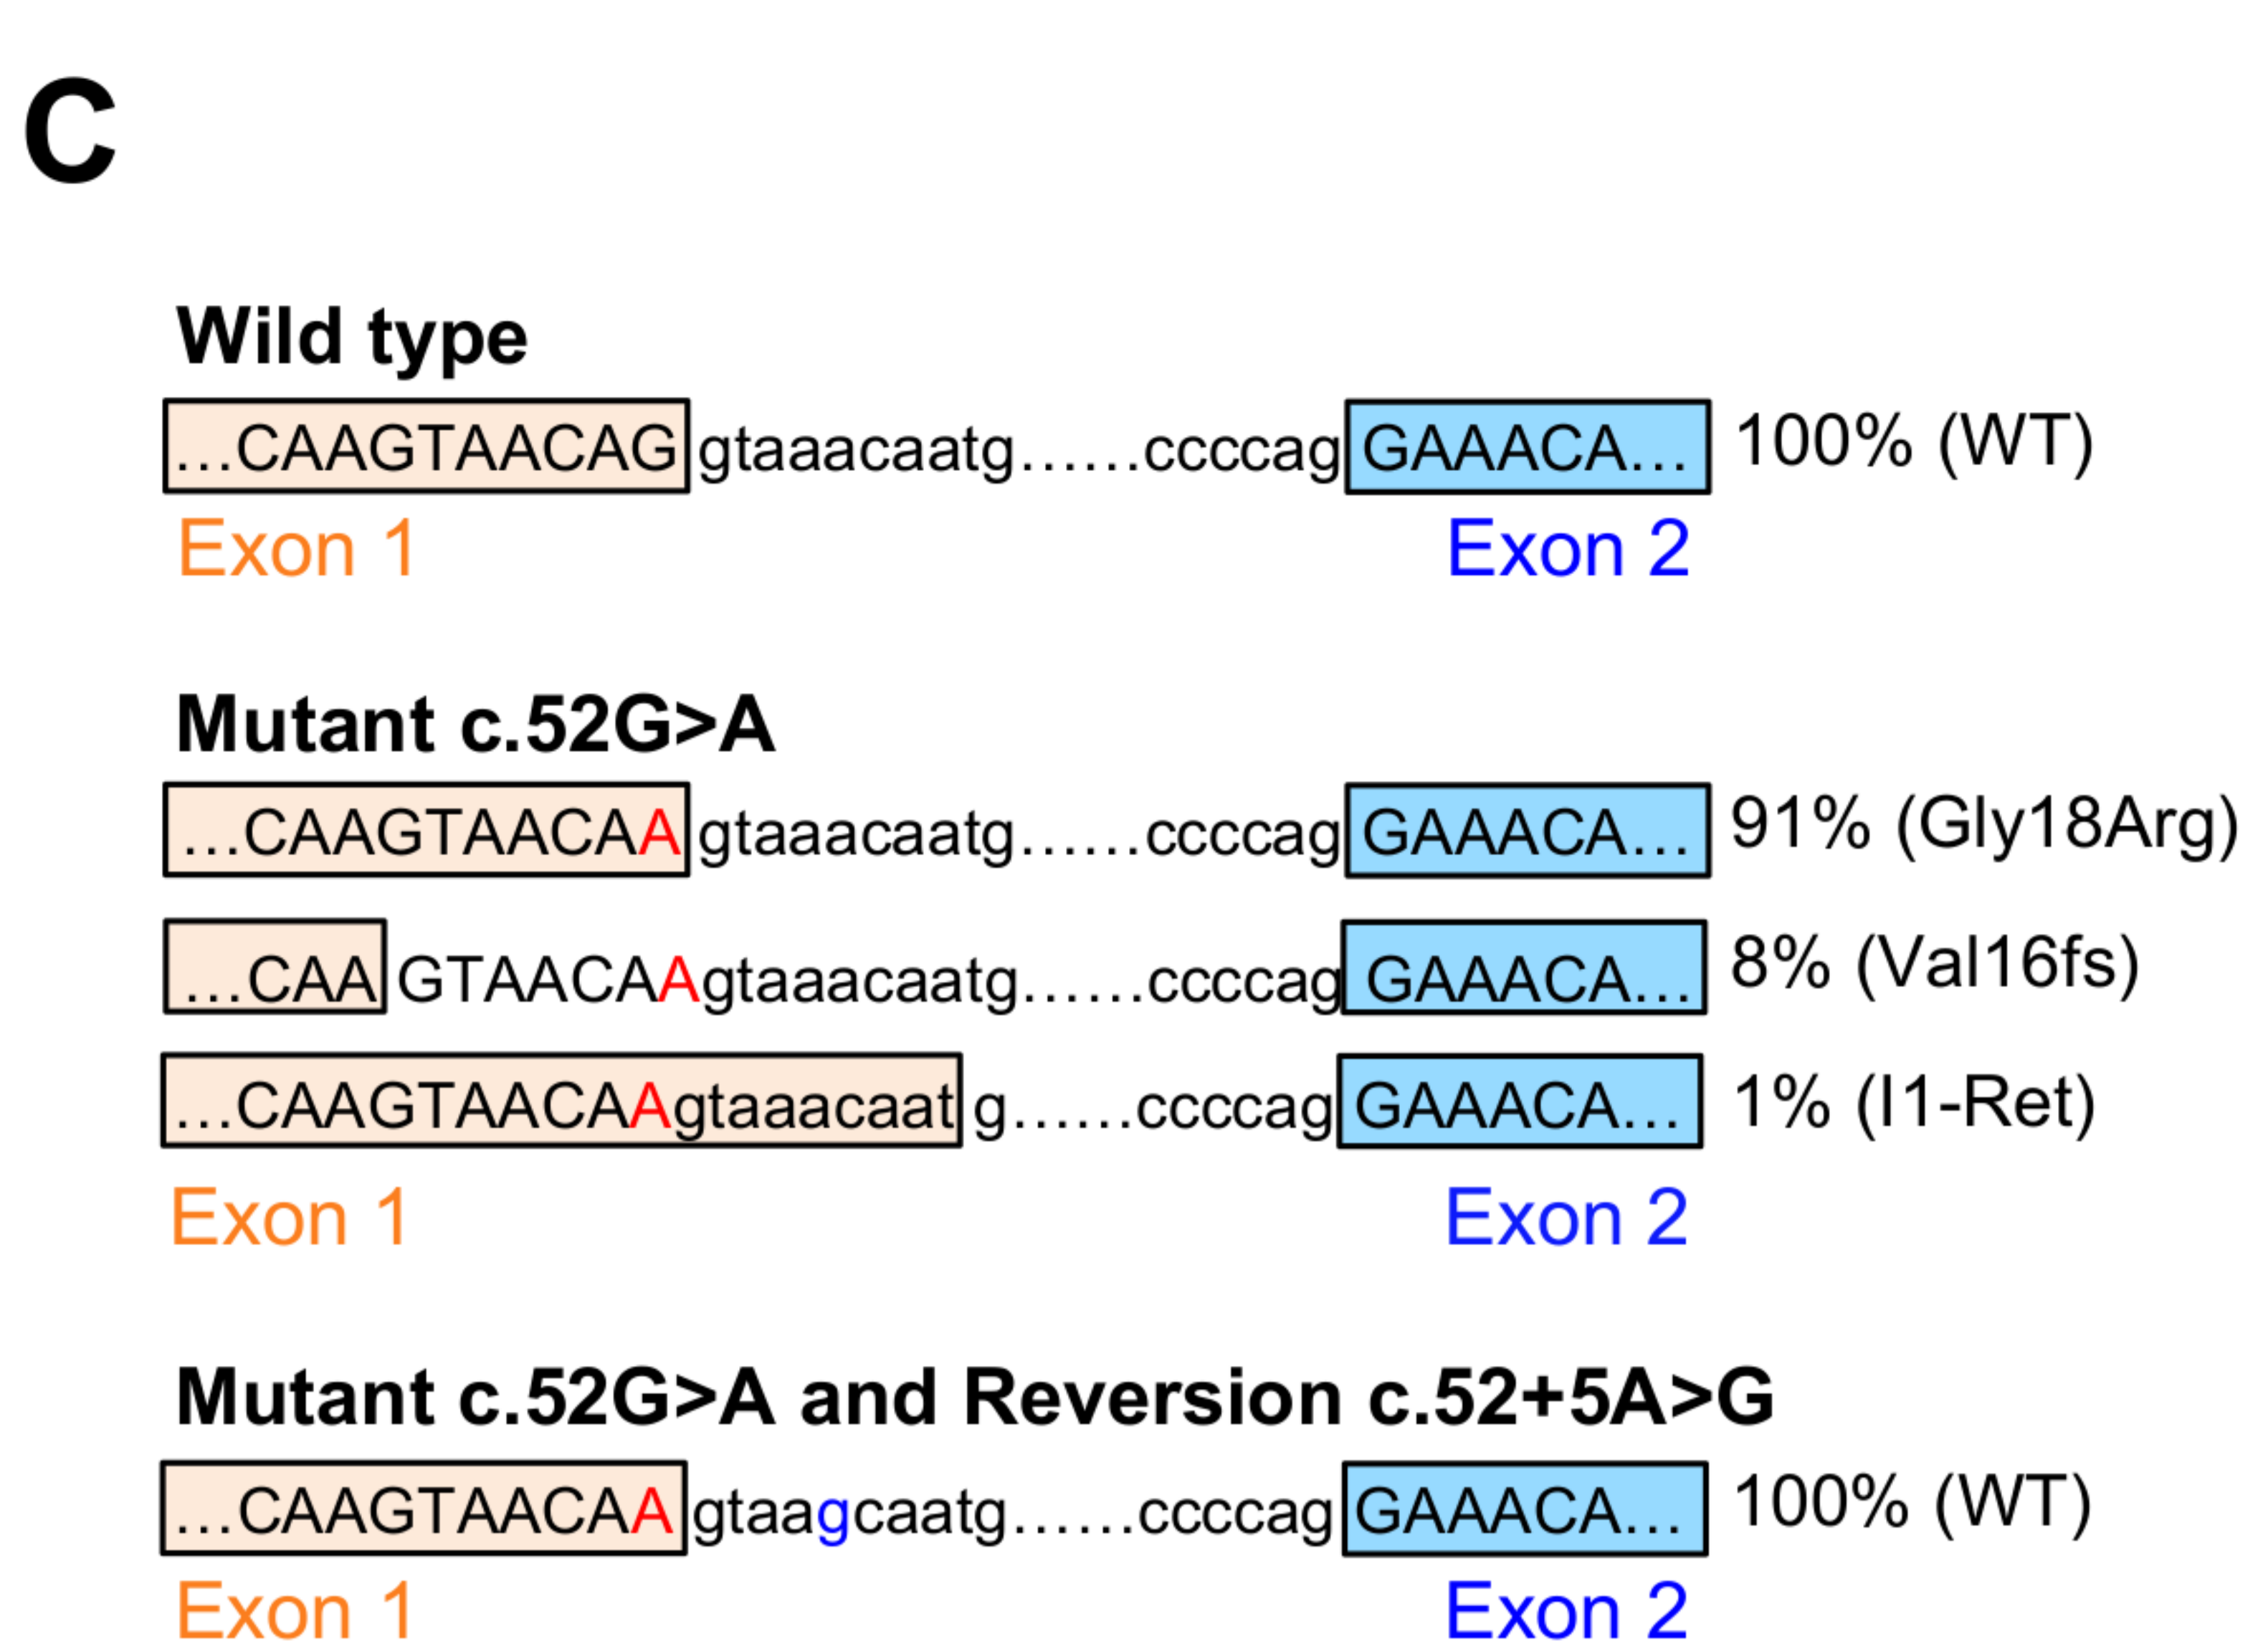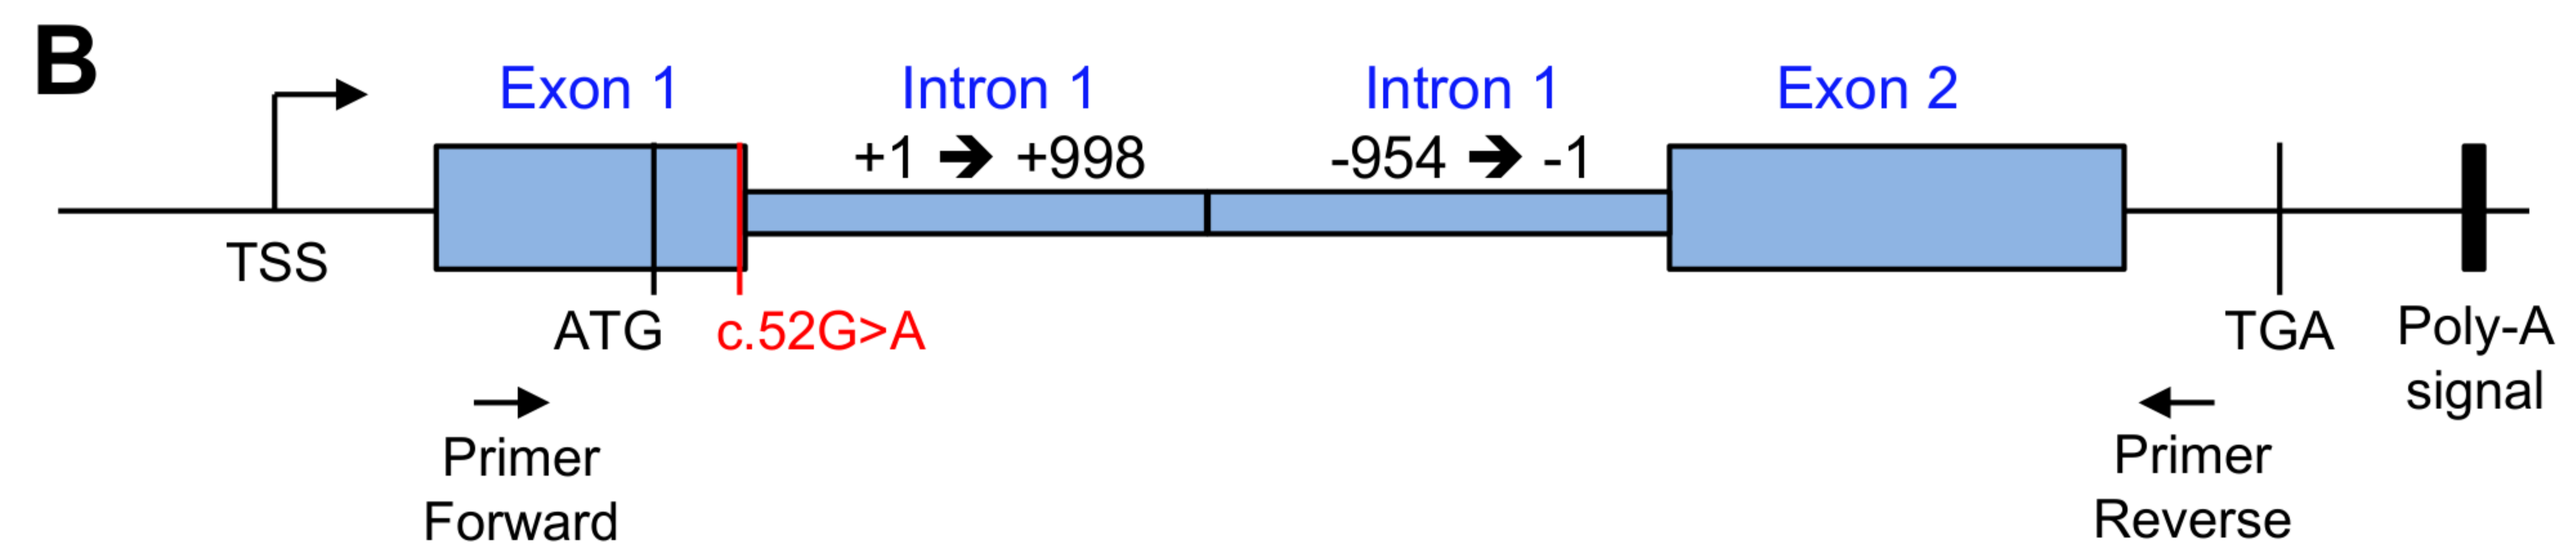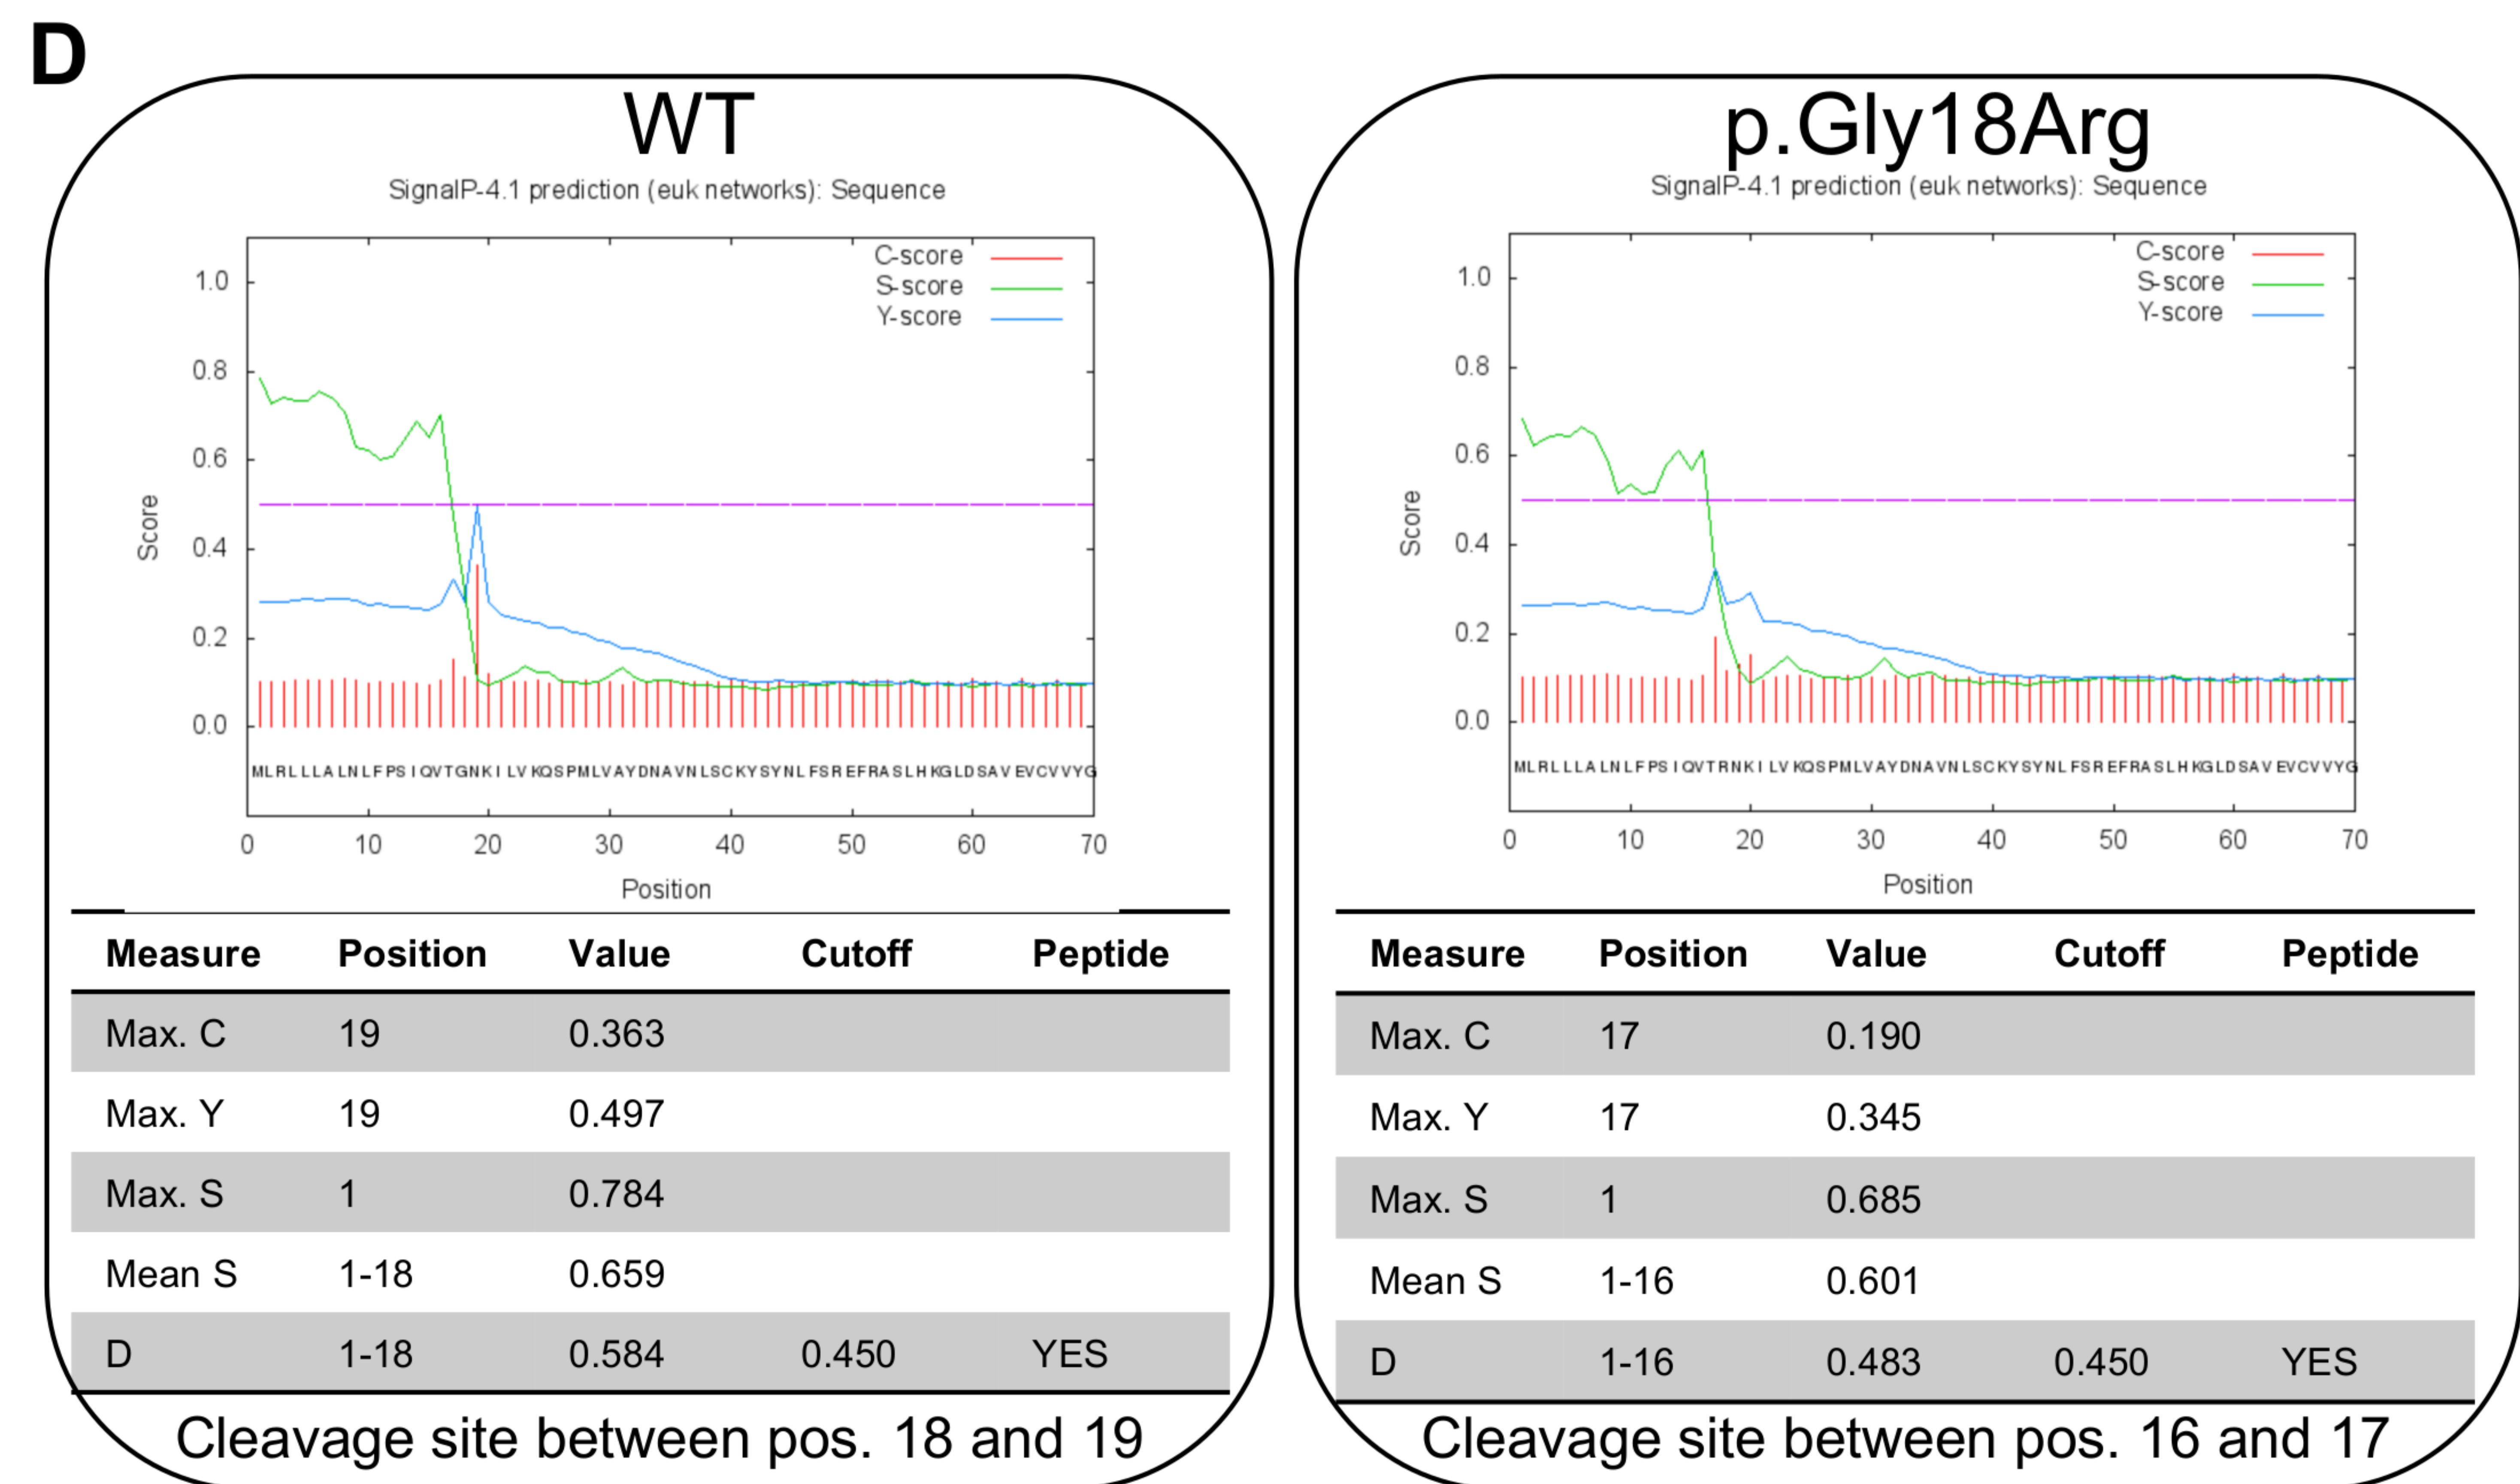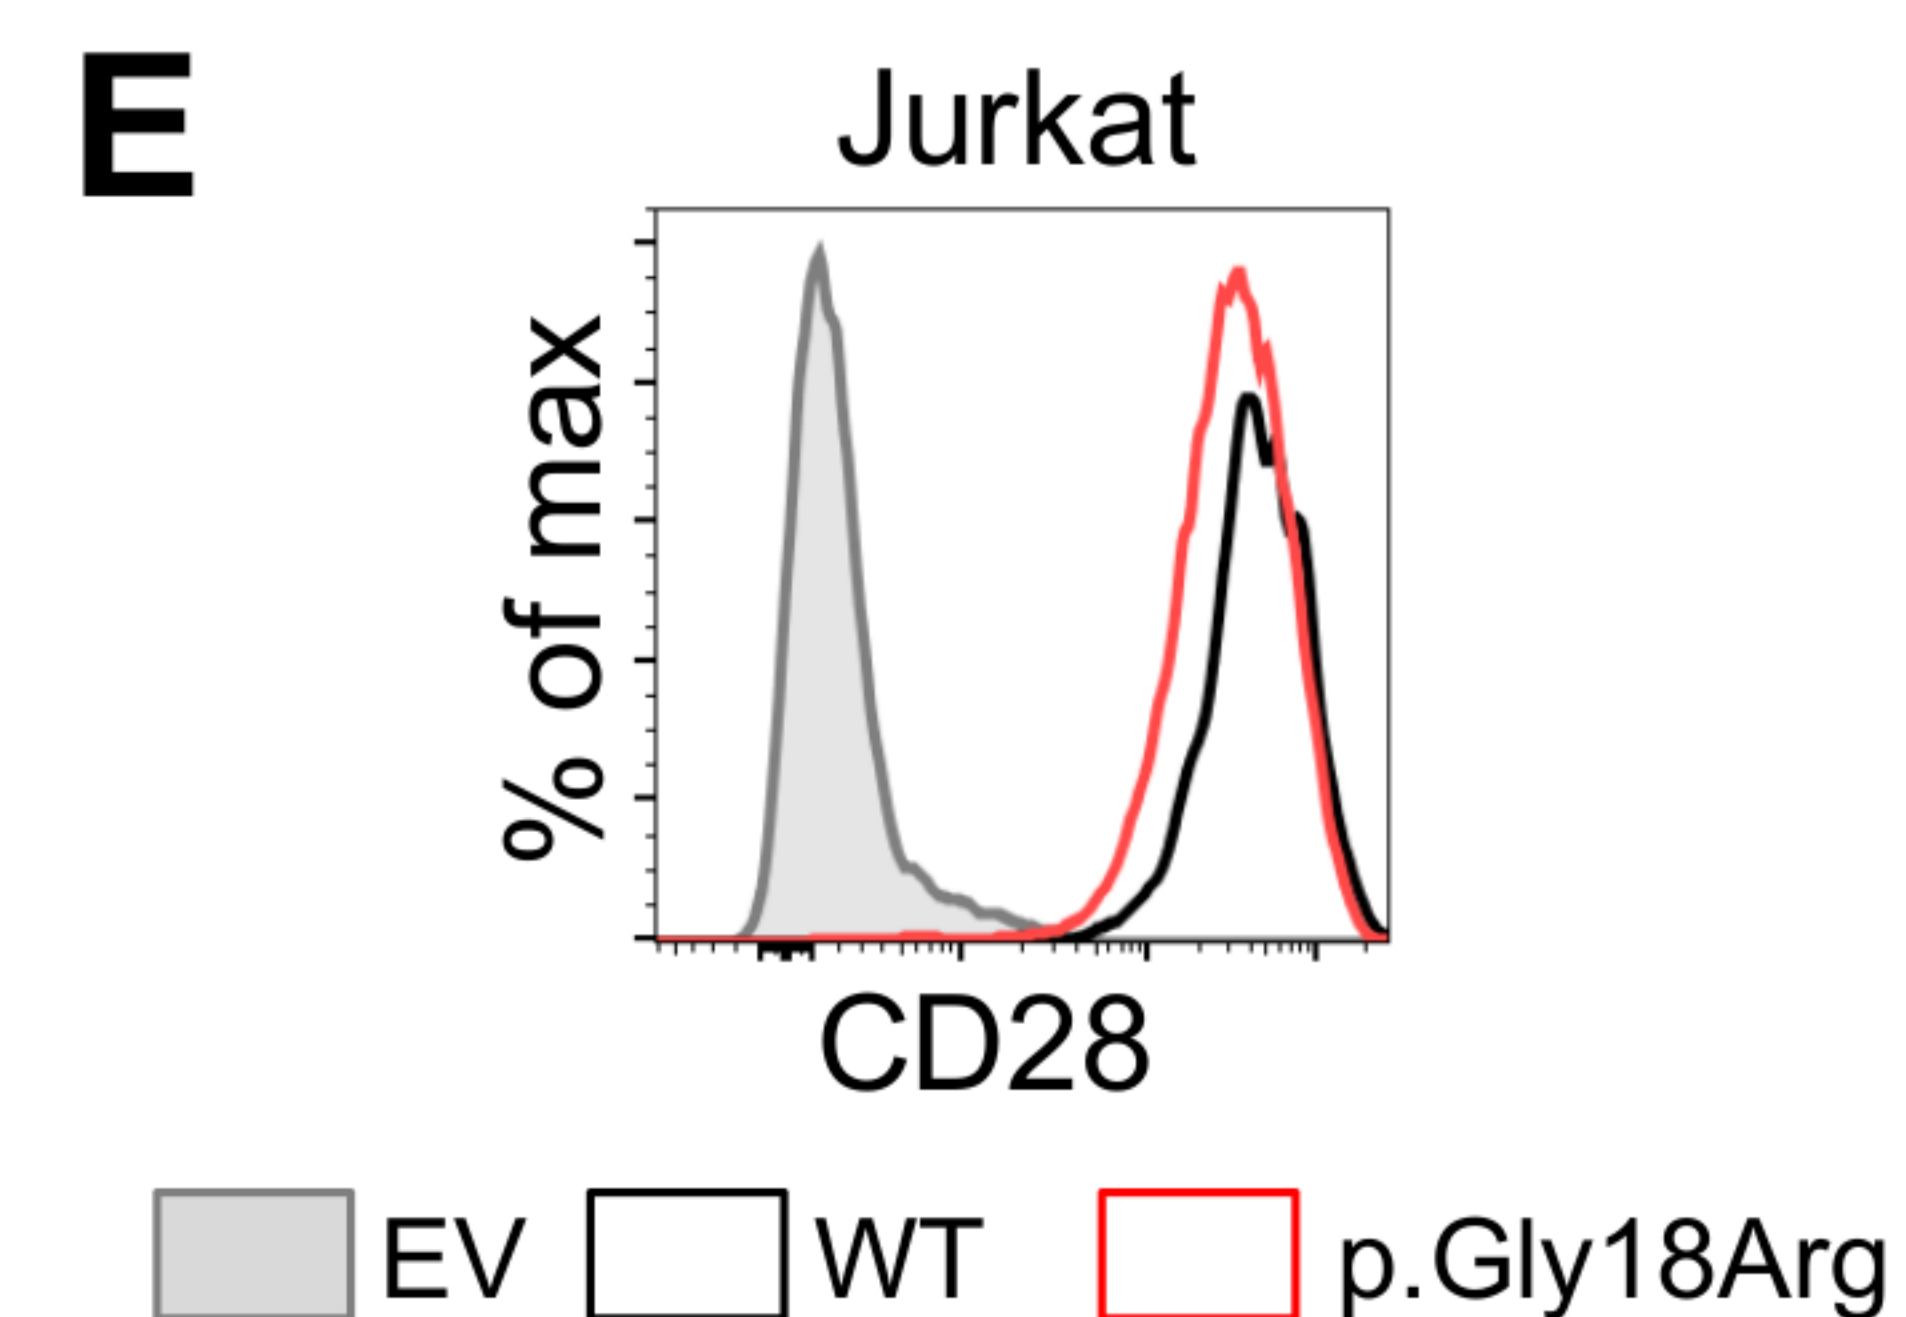

Supplement: NIHMS1717953-supplement-6.pdf [file NIHMS1717953-supplement-6.pdf]

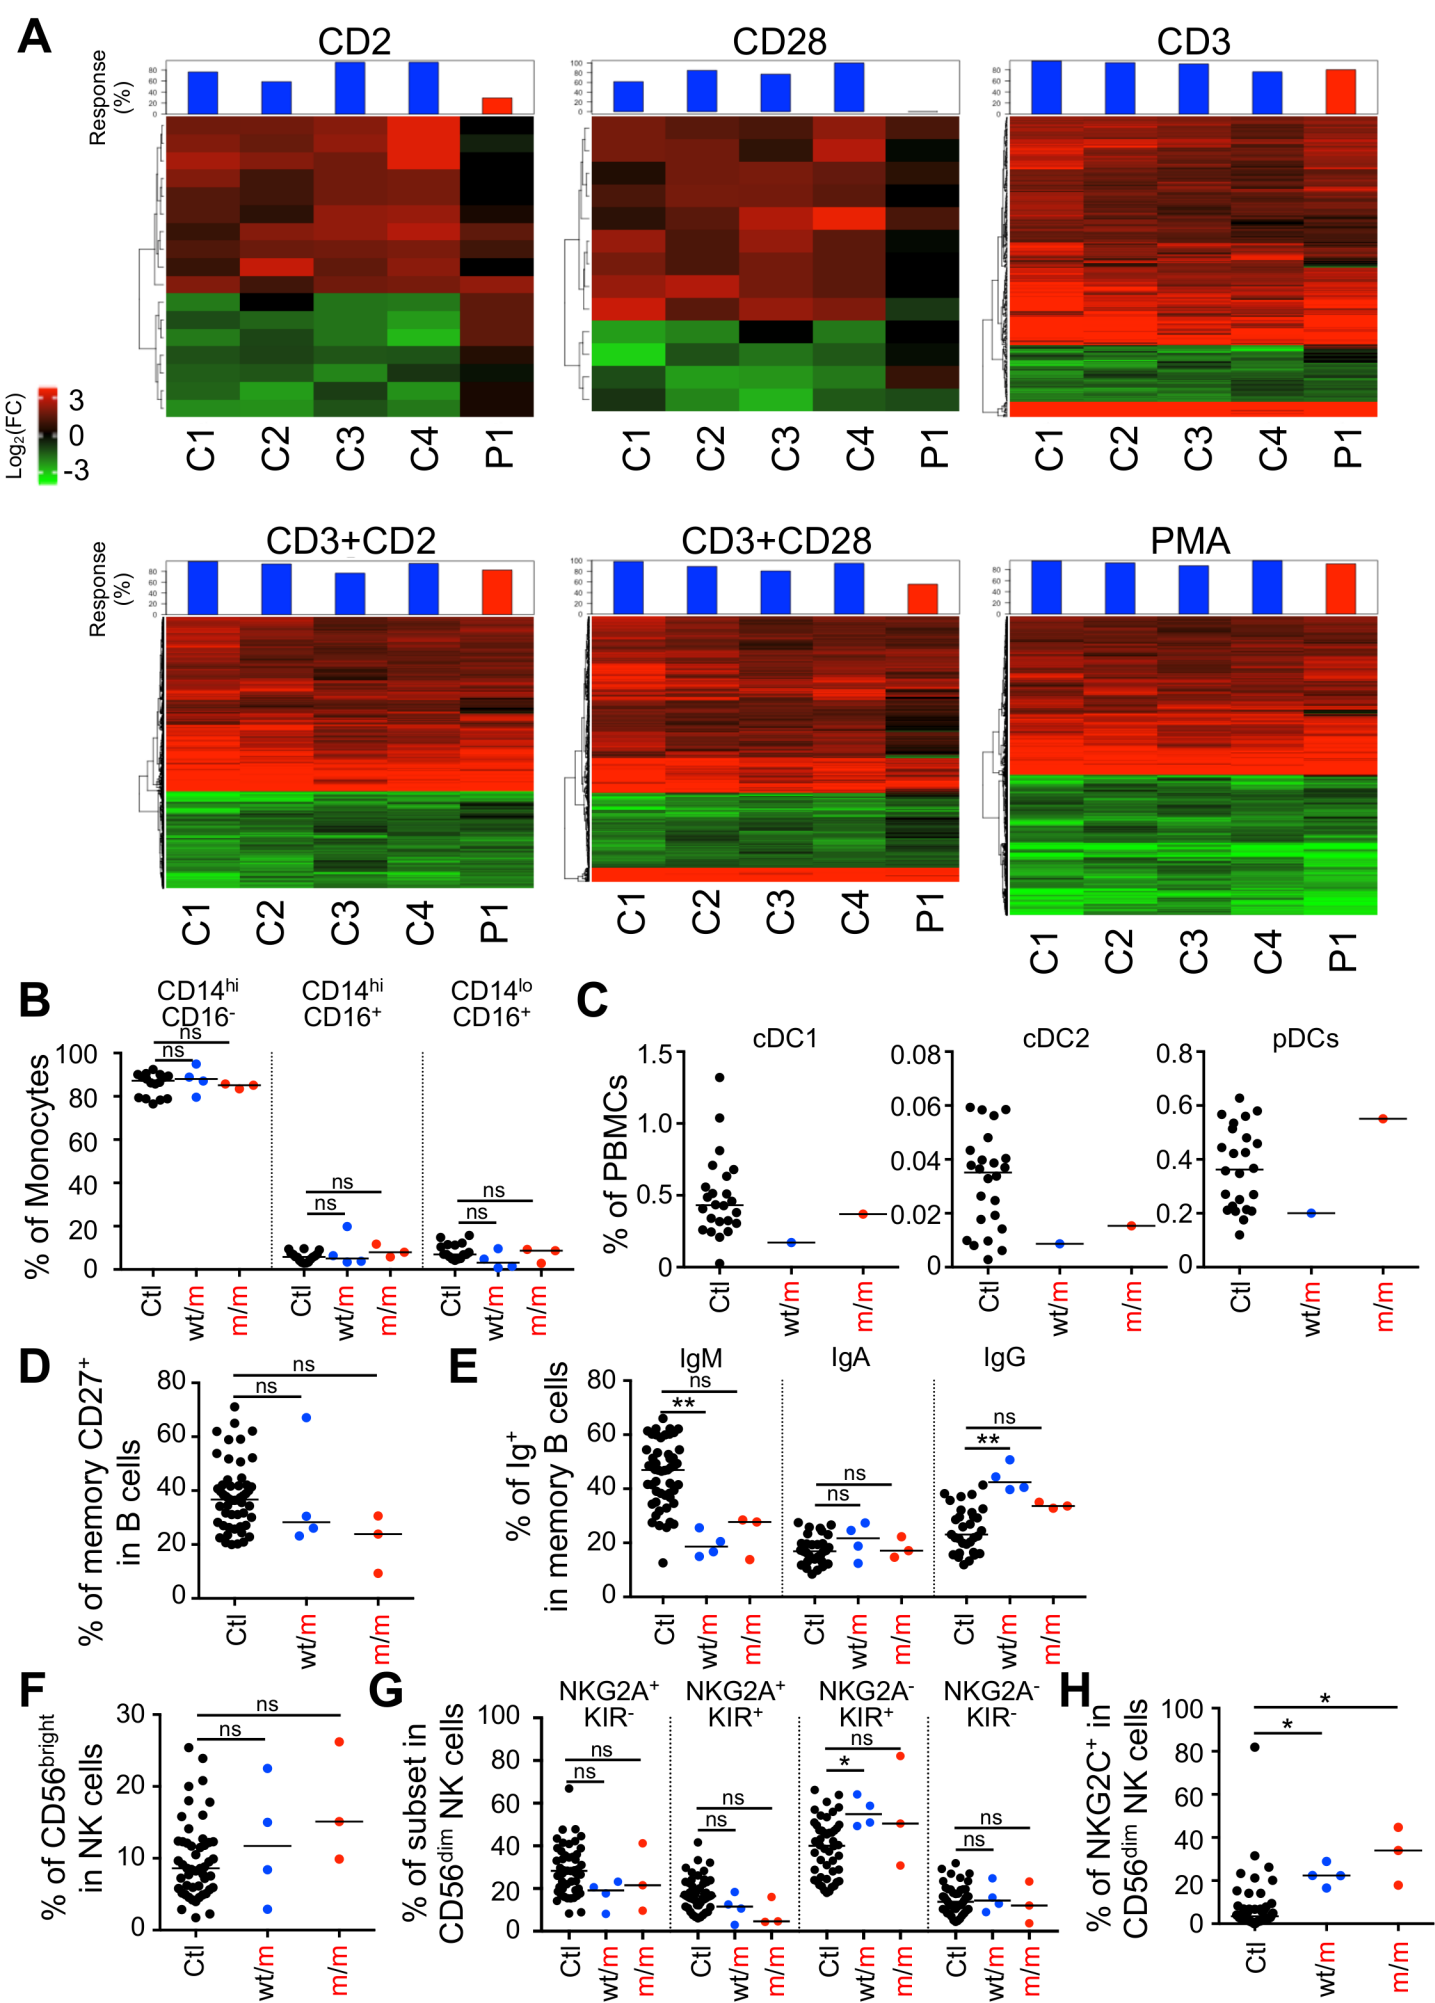

Supplement: NIHMS1717953-supplement-7.pdf [file NIHMS1717953-supplement-7.pdf]

**A**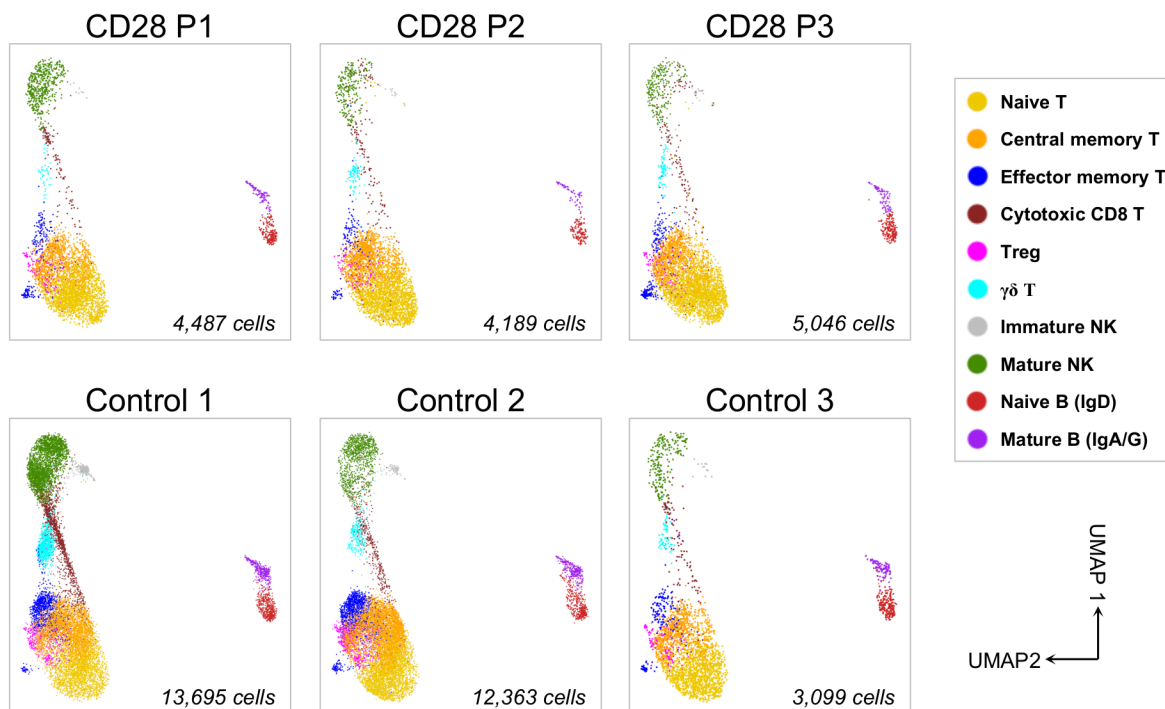**B**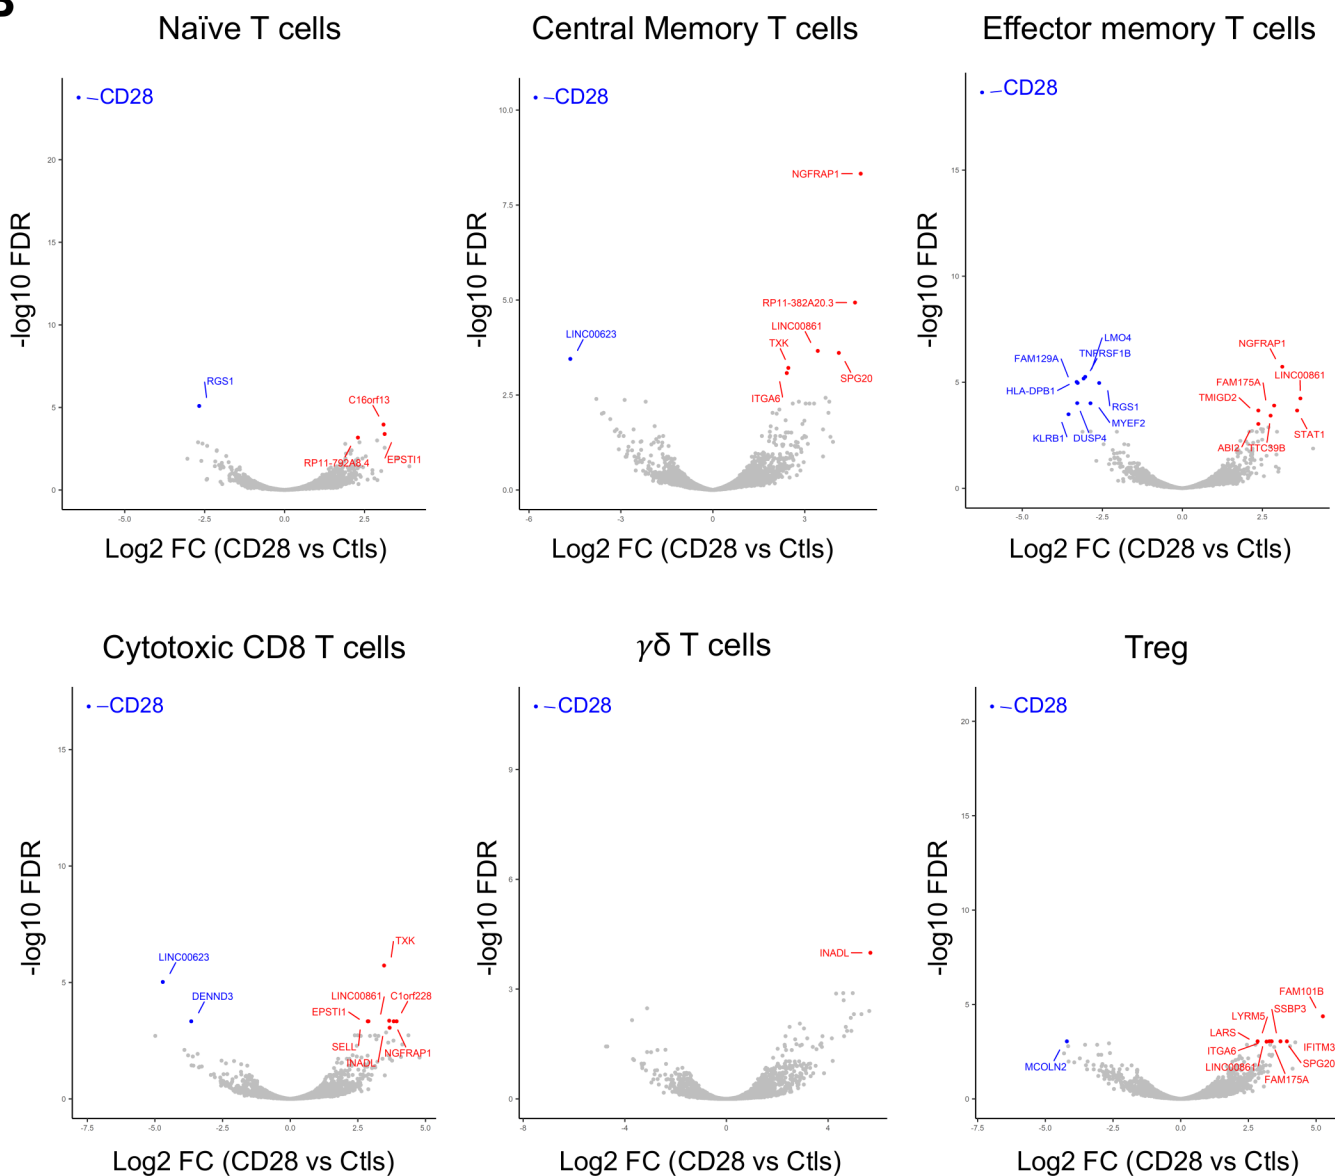

Supplement: NIHMS1717953-supplement-8.pdf [file NIHMS1717953-supplement-8.pdf]

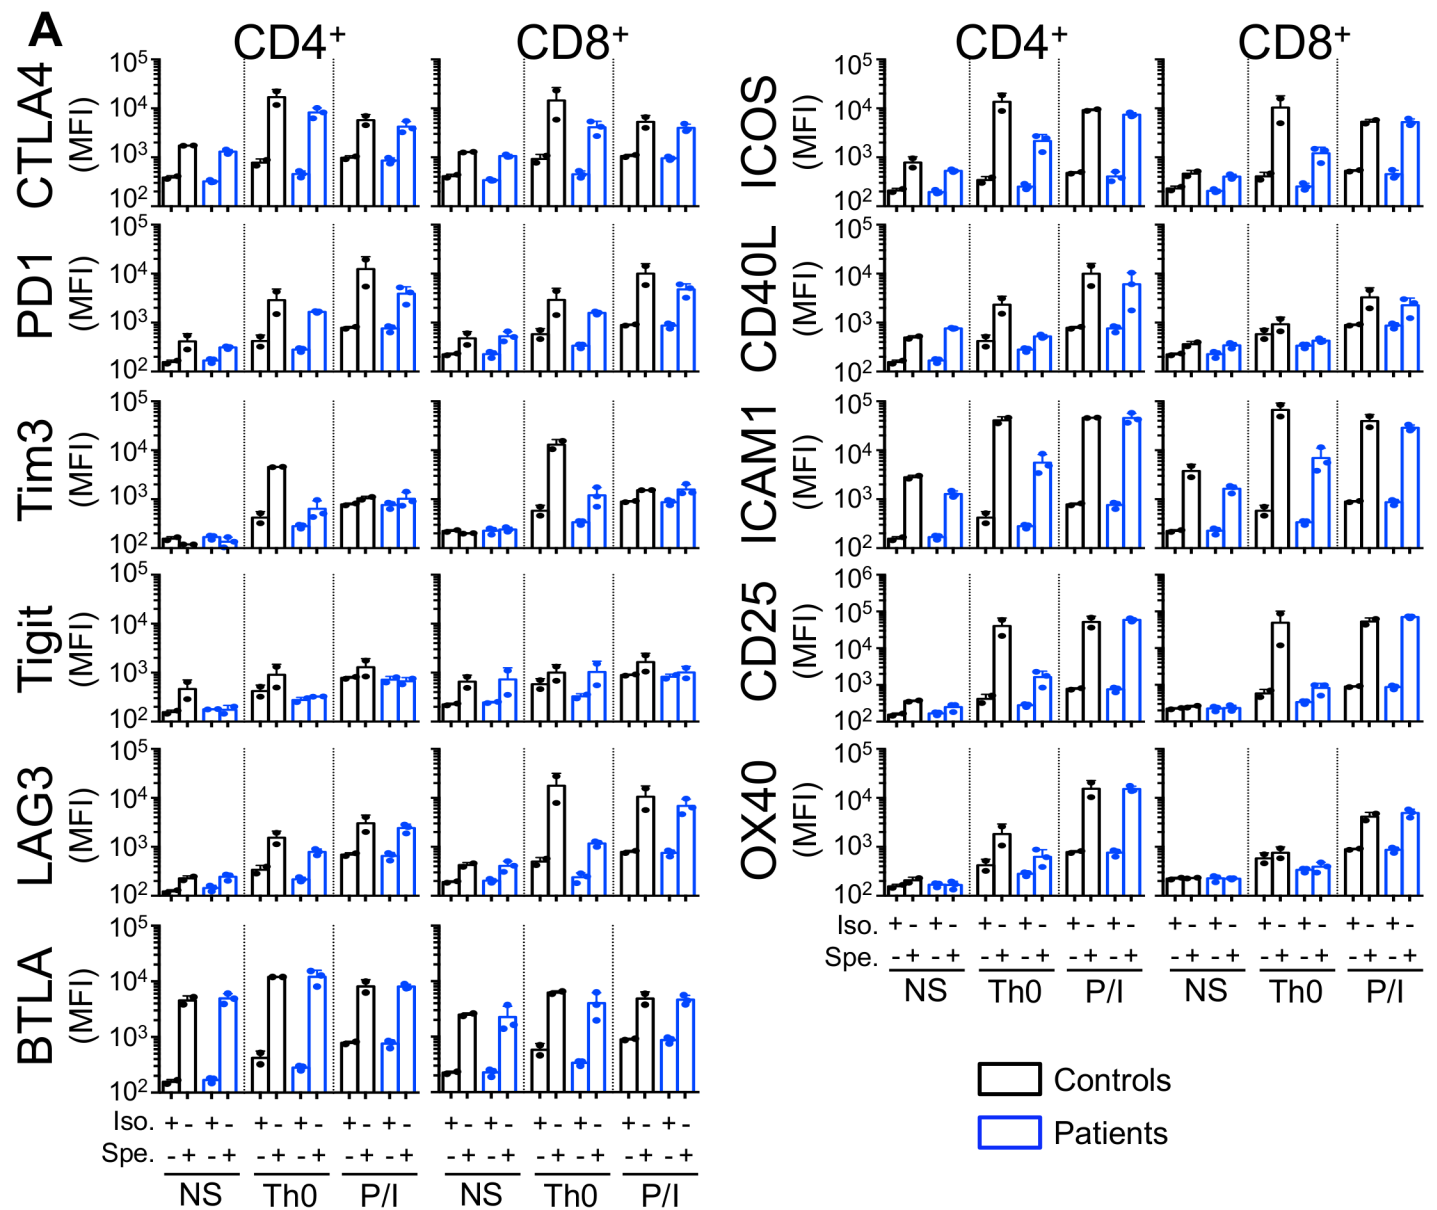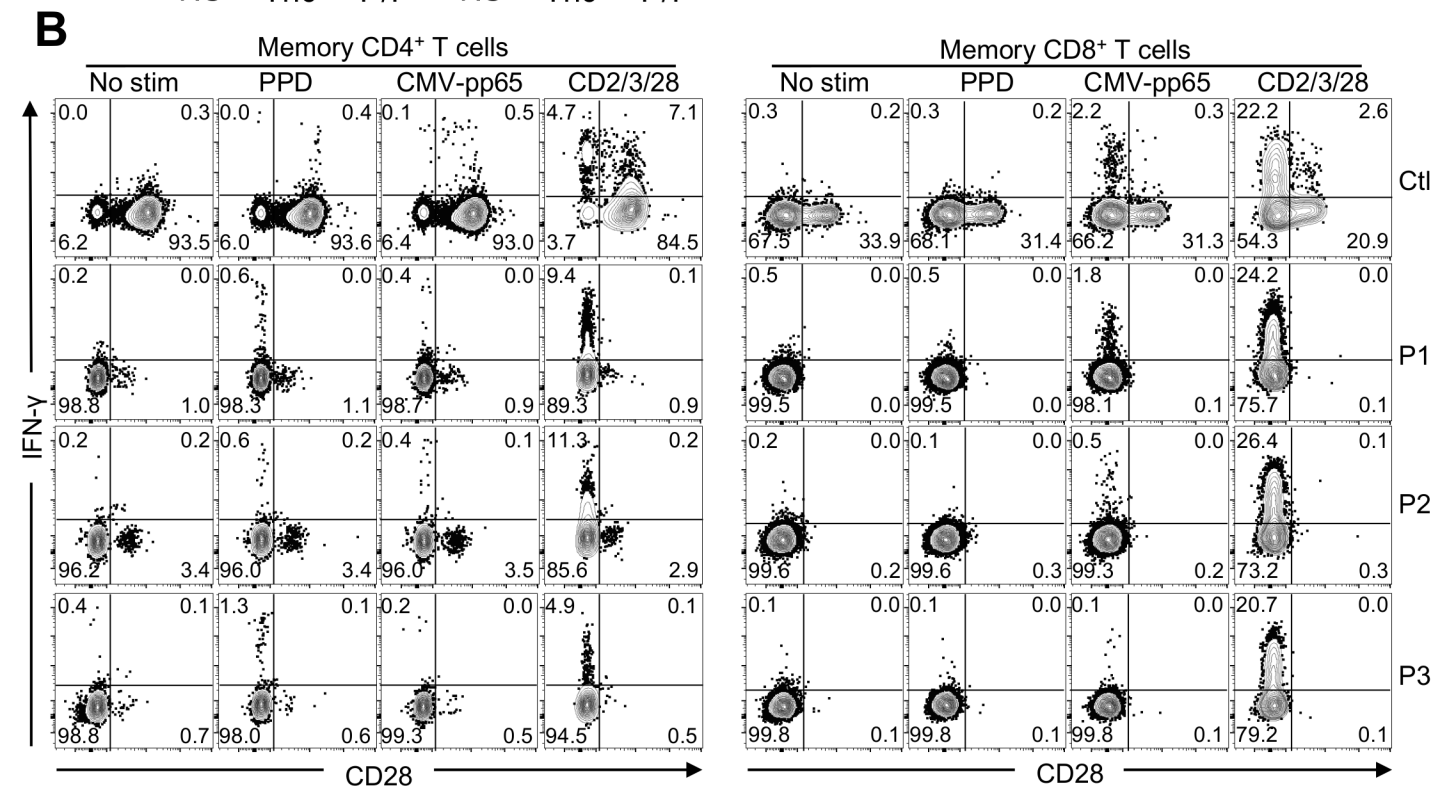

Supplement: NIHMS1717953-supplement-9.pdf [file NIHMS1717953-supplement-9.pdf]
